# Supplementary material for: Increased depression-related behavior during the postpartum period in inbred BALB/c and C57BL/6 strains
Source: Mol Brain. 2019 Aug 9;12:70. doi: 10.1186/s13041-019-0490-z (PMC6688268; doi:10.1186/s13041-019-0490-z)
Supplement: Supplementary file 1 — Table S1. Statistical analyses of behavioral data in females of four inbred strains of mice (C57BL/6J, C57BL/6JJcl, BALB/cAnNCrlCrlj, and BALB/cAJcl). Table S2. Number of mice showing tail climbing behavior for more than 30 s in the tail suspension test. Table S3. Statistical analyses of behavioral data of nulliparous and lactating primiparous BALB/cAJcl female mice. Table S4. Statistical analyses of behavioral data in BALB/cAJcl female mice previously exposed to chronic restraint stress. (XLSX 30 kb) [file 13041_2019_490_MOESM1_ESM.xlsx]

## Sheet: Supplementary Table 1
Supplementary Table 1 Statistical analyses of behavioral data in females of four inbred strains of mice (C57BL/6J, C57BL/6JJcl, BALB/cAnNCrlCrlj, and BALB/cAJcl).
Significant main effects and significant interactions, which achieved a study-wide significance after false discovery rate (FDR) correction for multiple testing, are highlighted in yellow.
Nominally significant main effects and nominally significant interactions, which failed to reach a study-wide significance after false discovery rate (FDR) correction for multiple testing, are highlighted in grey.
Test	Measure	Figure		ANOVA
				Strain		Reproductive state		Strain × Reproductive state		Block/Time		Strain × Block/Time		Reproductive state × Block/Time		Strain × Reproductive state × Block/Time
Open field test	Distance traveled (cm)	Figure 1A		F3,154 = 48.73, p < 0.0001		F2,154 = 8.42, p = 0.0003		F6,154 = 0.99, p = 0.4354		F2,308 = 19.76, p < 0.0001		F6,308 = 27.60, p < 0.0001		F4,308 = 2.80, p = 0.0262		F12,308 = 2.39, p = 0.0059
	Vertical activity	Figure 1B		F3,154 = 130.74, p < 0.0001		F2,154 = 11.01, p < 0.0001		F6,154 = 2.00, p = 0.0694		F2,308 = 113.52, p < 0.0001		F6,308 = 2.99, p = 0.0074		F4,308 = 5.91, p = 0.0001		F12,308 = 1.73, p = 0.0606
	Center time (s)	Figure 1C		F3,154 = 47.17, p < 0.0001		F2,154 = 2.77, p = 0.0659		F6,154 = 0.71, p = 0.6457		F2,308 = 116.43, p < 0.0001		F6,308 = 9.34, p < 0.0001		F4,308 = 2.37, p = 0.0522		F12,308 = 1.13, p = 0.3351
	Stereotypic counts	Figure 1D		F3,154 = 62.00, p < 0.0001		F2,154 = 0.87, p = 0.4227		F6,154 = 3.70, p = 0.0018		F2,308 = 15.54, p < 0.0001		F6,308 = 7.63, p < 0.0001		F4,308 = 3.94, p = 0.0039		F12,308 = 0.58, p = 0.8576
Light/dark transition test	Distance traveled (cm) in dark chamber	Figure 2A		F3,154 = 182.62, p < 0.0001		F2,154 = 0.51, p = 0.5991		F6,154 = 0.73, p = 0.6223
	Distance traveled (cm) in light chamber	Figure 2B		F3,154 = 30.33, p < 0.0001		F2,154 = 0.31, p = 0.7356		F6,154 = 1.77, p = 0.1078
	Time spent in light chamber (s)	Figure 2C		F3,154 = 23.10, p < 0.0001		F2,154 = 1.84, p = 0.1621		F6,154 = 1.85, p = 0.0932
	Number of transitions	Figure 2D		F3,154 = 31.16, p < 0.0001		F2,154 = 2.16, p = 0.1185		F6,154 = 1.34, p = 0.2441
	Latency to light chamber (s)	Figure 2E		F3,154 = 2.17, p = 0.0944		F2,154 = 0.35, p = 0.7046		F6,154 = 0.45, p = 0.8431
Elevated plus maze test	Distance traveled (cm)	Figure 3A		F3,154 = 68.93, p < 0.0001		F2,154 = 0.92, p = 0.4025		F6,154 = 0.49, p = 0.8146
	Number of total arm entries	Figure 3B		F3,154 = 32.15, p < 0.0001		F2,154 = 3.93, p = 0.0216		F6,154 = 1.21, p = 0.3062
	Time spent in closed arms (s)	Figure 3C		F3,154 = 3.94, p = 0.0096		F2,154 = 6.67, p = 0.0017		F6,154 = 2.06, p = 0.0607
	Entries into open arms (%)	Figure 3D		F3,154 = 13.38, p < 0.0001		F2,154 = 1.78, p = 0.1719		F6,154 = 0.31, p = 0.9293
	Time spent in open arms (%)	Figure 3E		F3,154 = 25.26, p < 0.0001		F2,154 = 2.23, p = 0.1106		F6,154 = 0.41, p = 0.8702
	Time spent in center area (s)	Figure 3F		F3,154 = 2.26, p = 0.0841		F2,154 = 6.02, p = 0.0030		F6,154 = 2.39, p = 0.0307
Porsolt forced swim test	Immobility time (%) on Day 1	Figure 4A, Supplementary Figure 1A		F3,154 = 29.95, p < 0.0001		F2,154 = 8.22, p = 0.0004		F6,154 = 2.88, p = 0.0110		F9,1386 = 338.49, p < 0.0001		F27,1386 = 1.85, p = 0.0051		F18,1386 = 1.48, p = 0.0891		F54,1386 = 0.79, p = 0.8603
	Distance traveled (cm) on Day 1	Figure 4B, Supplementary Figure 1B		F3,154 = 101.39, p < 0.0001		F2,154 = 8.24, p = 0.0004		F6,154 = 4.62, p = 0.0002		F9,1386 = 520.20, p < 0.0001		F27,1386 = 44.06, p < 0.0001		F18,1386 = 2.51, p = 0.0005		F54,1386 = 1.02, p = 0.4457
	Immobility time (%) on Day 2	Figure 4C, Supplementary Figure 1C		F3,154 = 7.35, p = 0.0001		F2,154 = 6.87, p = 0.0014		F6,154 = 4.20, p = 0.0006		F9,1386 = 22.37, p < 0.0001		F27,1386 = 1.12, p = 0.3049		F18,1386 = 1.30, p = 0.1764		F54,1386 = 0.63, p = 0.9830
	Distance traveled (cm) on Day 2	Figure 4D Supplementary Figure 1D		F3,154 = 23.89, p < 0.0001		F2,154 = 4.55, p = 0.0120		F6,154 = 4.93, p = 0.0001		F9,1386 = 22.04, p < 0.0001		F27,1386 = 2.18, p = 0.0005		F18,1386 = 1.04, p = 0.4138		F54,1386 = 1.01, p = 0.4533
Tail suspension test	Time of tail-climbing behavior (%)	Supplementary Figure 2A		F3,152 = 22.16, p < 0.0001		F2,152 = 8.62, p = 0.0003		F6,152 = 2.09, p = 0.0573
	Immobility time (%)*	Supplementary Figure 2B		F1,66 = 5.62, p = 0.0206		F2,66 = 1.60, p = 0.2105		F2,66 = 0.08, p = 0.9204		F9,594 = 73.77, p < 0.0001		F9,594 = 3.42, p = 0.0004		F18,594 = 1.20, p = 0.2578		F18,594 = 1.15, p = 0.3024
Sucrose preference test	1% sucrose preference (%)	Figure 5		F3,154 = 16.37, p < 0.0001		F2,154 = 6.21, p = 0.0025		F6,154 = 2.67, p = 0.0172
*Comparison between females of two inbred strains of mice (BALB/cAnNCrlCrlj and BALB/cAJcl)

## Sheet: Supplementary Table 2
Supplementary Table 2 Number of mice showing tail climbing behavior for more than 30 seconds in the tail suspension test.
Strain	Nulliparous	Nonlactating	Lactating
C57BL/6J	14 (15)	11 (12)	13 (17)
C57BL/6JJcl	14 (14)	7 (11)	8 (11)
BALB/cAnNCrlCrlj	0 (16)	0 (12)	0 (15)
BALB/cAJcl	7 (14)	5 (14)	0 (13)
Parentheses indicate the total number of mice tested in the tail suspension test

## Sheet: Supplementary Table 3
Supplementary Table 3 Statistical analyses of behavioral data of nulliparous and lactating primiparous BALB/cAJcl female mice.
Significant main effects and significant interactions, which achieved a study-wide significance after false discovery rate (FDR) correction for multiple testing, are highlighted in yellow.
Nominally significant main effects and nominally significant interactions, which failed to reach a study-wide significance after false discovery rate (FDR) correction for multiple testing, are highlighted in grey.
Test	Measure	Figure		ANOVA/t-test
				Reproductive state		Reproductive state × Block/Time		Reproductive state × Block/Time
Open field test	Distance traveled (cm)	Figure 7A		F1,22 = 2.99, p = 0.0976		F2,44 = 7.41, p = 0.0017		F2,44 = 3.52, p = 0.0381
	Vertical activity	Figure 7B		F1,22 = 0.00, p = 0.9615		F2,44 = 24.77, p < 0.0001		F2,44 = 2.24, p = 0.1188
	Center time (s)	Figure 7C		F1,22 = 0.01, p = 0.9421		F2,44 = 15.47, p = 0.0017		F2,44 = 2.60, p = 0.0855
	Stereotypic counts	Figure 7D		F1,22 = 0.49, p = 0.4916		F2,44 = 0.37, p = 0.6918		F2,44 = 3.50, p = 0.0388
Light/dark transition test	Distance traveled (cm) in dark chamber	Figure 7E		t22 = 3.07, p = 0.0756
	Distance traveled (cm) in light chamber	Figure 7F		t22 = 0.50, p = 0.6211
	Time spent in light chamber (s)	Figure 7G		t22 = 0.78, p = 0.4446
	Number of transitions	Figure 7H		t22 = 1.75, p = 0.0944
	Latency to light chamber (s)	Figure 7I		t22 = 0.53, p = 0.6042
Elevated plus maze test	Distance traveled (cm)	Figure 7J		t22 = 2.39, p = 0.0257
	Number of total arm entries	Figure 7K		t22 = 2.82, p = 0.0100
	Time spent in closed arms (s)	Figure 7L		t22 = 2.88, p = 0.0088
	Entries into open arms (%)	Figure 7M		t22 = 1.56, p = 0.1325
	Time spent in open arms (%)	Figure 7N		t22 = 0.31, p = 0.7628
	Time spent in center area (s)	Figure 7O		t22 = 3.57, p = 0.0017
Porsolt forced swim test	Immobility time (%) on Day 1	Figure 7P		F1,22 = 2.63, p = 0.1192		F9,198 = 35.05, p < 0.0001		F9,198 = 1.54, p = 0.1359
	Distance traveled (cm) on Day 1	Figure 7Q		F1,22 = 5.11, p = 0.0341		F9,198 = 12.93, p < 0.0001		F9,198 = 2.04, p = 0.0364
	Immobility time (%) on Day 2	Figure 7R		F1,22 = 7.59, p = 0.0116		F9,198 = 1.93, p = 0.0498		F9,198 = 1.68, p = 0.0950
	Distance traveled (cm) on Day 2	Figure 7S		F1,22 = 7.03, p = 0.0146		F9,198 = 1.40, p = 0.1897		F9,198 = 0.95, p = 0.4865
Tail suspension test	Immobility time (%)	Figure 7T		F1,18 = 3.35, p = 0.0839		F9,162 = 24.23, p < 0.0001		F9,162 = 0.24, p = 0.9884
Sucrose preference test	1% sucrose preference (%)	Figure 7U		t22 = 1.17, p = 0.2543

## Sheet: Supplementary Table 4
Supplementary Table 4 Statistical analyses of behavioral data in BALB/cAJcl female mice previously exposed to chronic restraint stress.
Significant main effects and significant interactions, which achieved a study-wide significance after false discovery rate (FDR) correction for multiple testing, are highlighted in yellow.
Nominally significant main effects and nominally significant interactions, which failed to reach a study-wide significance after false discovery rate (FDR) correction for multiple testing, are highlighted in grey.
Test	Measure	Figure		ANOVA
				Reproductive state		Stress		Reproductive state × Stress		Block/Time		Reproductive state × Block/Time		Stress × Block/Time		Reproductive state × Stress × Block/Time
Open field test	Distance traveled (cm)	Figure 8A		F1,46 = 8.95, p = 0.0044		F1,46 = 0.22, p = 0.6438		F1,46 = 1.00, p = 0.3218		F2,92 = 2.84, p = 0.0637		F2,92 = 8.49, p = 0.0004		F2,92 = 0.09, p = 0.9129		F2,92 = 0.30, p = 0.7435
	Vertical activity	Figure 8B		F1,46 = 0.12, p = 0.7286		F1,46 = 0.22, p = 0.6390		F1,46 = 2.52, p = 0.1193		F2,92 = 38.36, p < 0.0001		F2,92 = 0.11, p = 0.8981		F2,92 = 0.35, p = 0.7043		F2,92 = 0.82, p = 0.4427
	Center time (s)	Figure 8C		F1,46 = 0.75, p = 0.3899		F1,46 = 0.24, p = 0.6281		F1,46 = 0.05, p = 0.8296		F2,92 = 16.68, p < 0.0001		F2,92 = 2.33, p = 0.1034		F2,92 = 0.48, p = 0.6224		F2,92 = 0.03, p = 0.9725
	Stereotypic counts	Figure 8D		F1,46 = 13.69, p = 0.0006		F1,46 = 0.01, p = 0.9232		F1,46 = 0.22, p = 0.6421		F2,92 = 3.20, p = 0.0452		F2,92 = 11.40, p < 0.0001		F2,92 = 0.19, p = 0.8275		F2,92 = 0.15, p = 0.8629
Light/dark transition test	Distance traveled (cm) in dark chamber	Figure 8E		F1,46 = 4.43, p = 0.0407		F1,46 = 5.80, p = 0.0201		F1,46 = 0.79, p = 0.3776
	Distance traveled (cm) in light chamber	Figure 8F		F1,46 = 7.38, p = 0.0092		F1,46 = 4.76, p = 0.0343		F1,46 = 1.02, p = 0.3181
	Time spent in light chamber (s)	Figure 8G		F1,46 = 13.20, p = 0.0007		F1,46 = 15.75, p = 0.0003		F1,46 = 2.67, p = 0.1090
	Number of transitions	Figure 8H		F1,46 = 0.01, p = 0.9336		F1,46 = 0.03, p = 0.8667		F1,46 = 0.07, p = 0.7877
	Latency to light chamber (s)	Figure 8I		F1,46 = 4.71, p = 0.0352		F1,46 = 3.73, p = 0.0597		F1,46 = 0.20, p = 0.6605
Porsolt forced swim test	Immobility time (%) on Day 1	Figure 8J		F1,46 = 1.69, p = 0.2003		F1,46 = 0.31, p = 0.5786		F1,46 = 0.02, p = 0.8989		F9,414 = 80.77, p < 0.0001		F9,414 = 0.30, p = 0.9743		F9,414 = 0.89, p = 0.5312		F9,414 = 0.36, p = 0.9525
	Distance traveled (cm) on Day 1	Figure 8K		F1,46 = 0.92, p = 0.3434		F1,46 = 0.09, p = 0.7632		F1,46 = 0.15, p = 0.7034		F9,414 = 43.26, p < 0.0001		F9,414 = 2.30, p = 0.0156		F9,414 = 1.07, p = 0.3806		F9,414 = 0.77, p = 0.6414
	Immobility time (%) on Day 2	Figure 8L		F1,46 = 14.05, p = 0.0005		F1,46 = 1.33, p = 0.2556		F1,46 = 0.25, p = 0.6180		F9,414 = 8.41, p < 0.0001		F9,414 = 0.91, p = 0.5132		F9,414 = 1.32, p = 0.2222		F9,414 = 0.90, p = 0.5222
	Distance traveled (cm) on Day 2	Figure 8M		F1,46 = 4.06, p = 0.0498		F1,46 = 0.53, p = 0.4723		F1,46 = 0.07, p = 0.7976		F9,414 = 2.20, p = 0.0210		F9,414 = 0.42, p = 0.9240		F9,414 = 1.93, p = 0.0465		F9,414 = 1.30, p = 0.2331
Tail suspension test	Immobility time (%)	Figure 8N		F1,34 = 1.95, p = 0.1712		F1,34 = 0.03, p = 0.8709		F1,34 = 0.52, p = 0.4738		F9,306 = 37.45, p < 0.0001		F9,306 = 1.40, p = 0.1851		F9,306 = 1.08, p = 0.3739		F9,306 = 0.82, p = 0.5949
Sucrose preference test	2% sucrose preference (%)	Figure 8O		F1,46 = 0.03, p = 0.8710		F1,46 = 3.32, p = 0.0751		F1,46 = 1.95, p = 0.1694
